# Supplementary material for: Thread-based isoelectric focusing coupled with desorption electrospray ionization mass spectrometry
Source: Royal Society of Chemistry journal article supplement (doi:10.1039/d0an01344g), 2020-01-01
Supplement: d0an01344g1.pdf [file d0an01344g1.pdf]

## **Thread-based isoelectric focusing coupled with desorption electrospray ionisation mass spectrometry**

**Liang Chen <sup>a,b</sup>, Joan M. Cabot <sup>a,b</sup>, Estrella Sanz Rodriguez<sup>b</sup>, Alireza Ghiasvand <sup>b,c</sup>, Peter  
C. Innis<sup>d</sup> and Brett Paull<sup>\*a,b</sup>**

*<sup>a</sup>ARC Centre of Excellence for Electromaterials Science (ACES), School of Natural  
Sciences, Faculty of Science, Engineering and Technology, University of Tasmania,  
Private Bag 75, Hobart, TAS 7001, Australia. E-mail: [brett.paull@utas.edu.au](mailto:brett.paull@utas.edu.au);  
Fax: +61 3 6226 2858; Tel: +61 3 6226 6680*

*<sup>b</sup>Australian Centre for Research on Separation Science (ACROSS), School of Natural  
Sciences, Faculty of Science, Engineering and Technology, University of Tasmania,  
Private Bag 75, Hobart, TAS 7001, Australia.*

*<sup>c</sup>Department of Chemistry, Lorestan University, Khoramabad, Iran*

*<sup>d</sup>ARC Centre of Excellence for Electromaterials Science (ACES), AIIM Facility,  
Innovation campus, University of Wollongong, NSW 2500, Australia*

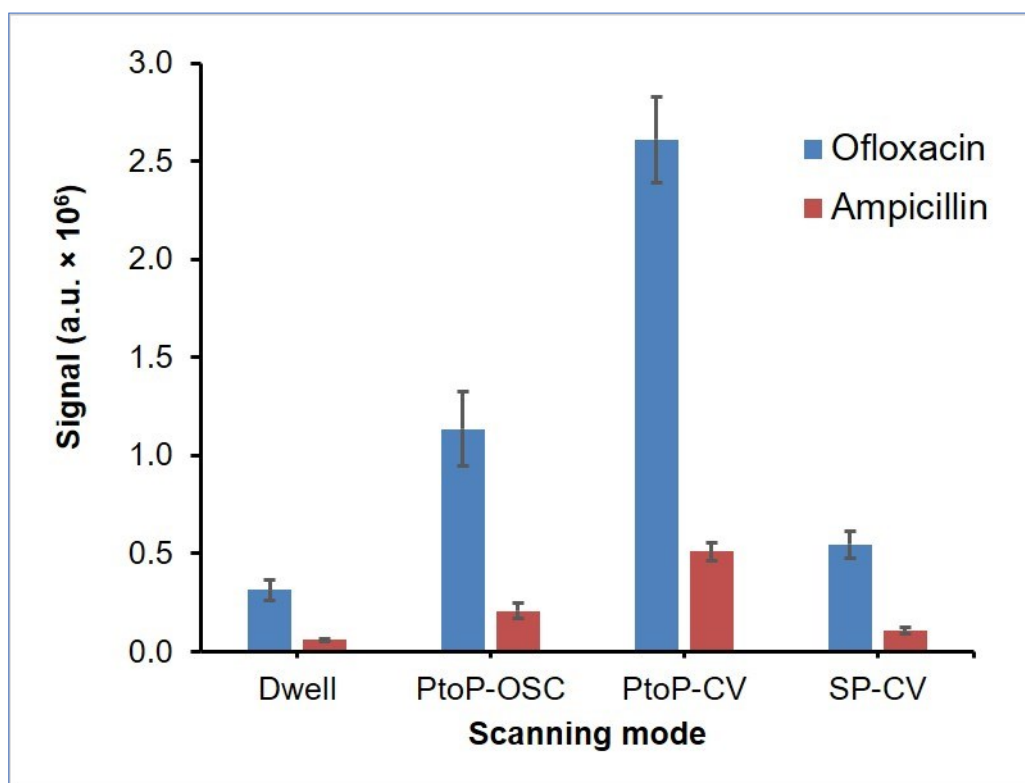

**Fig. S1.** DESI-MS signal intensities of 10  $\mu\text{g mL}^{-1}$  ofloxacin and ampicillin in different scanning modes.

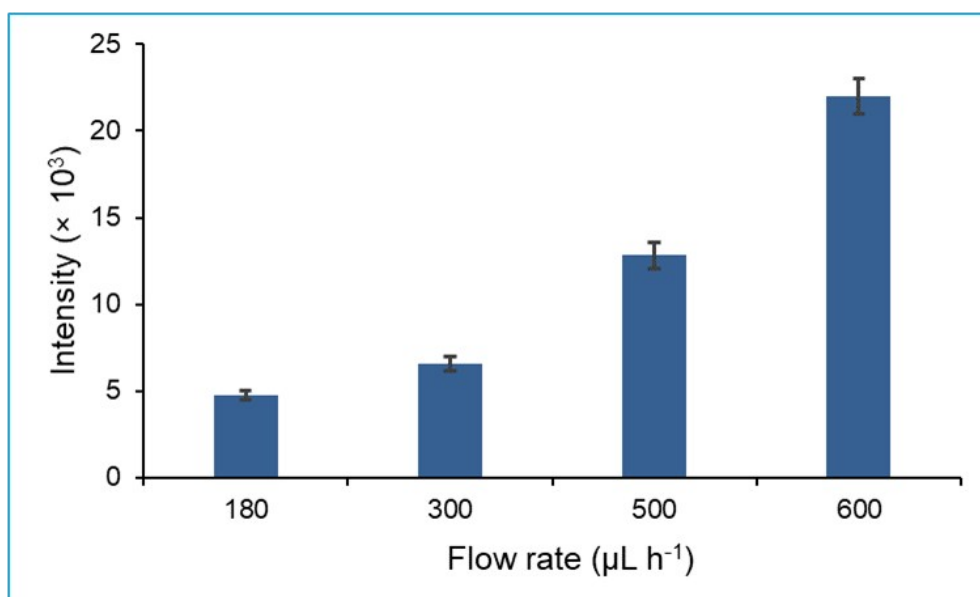

**Fig. S2.** DESI-MS signal intensities of insulin (50  $\mu\text{g mL}^{-1}$ ) with different spray solvent delivering flow rates.

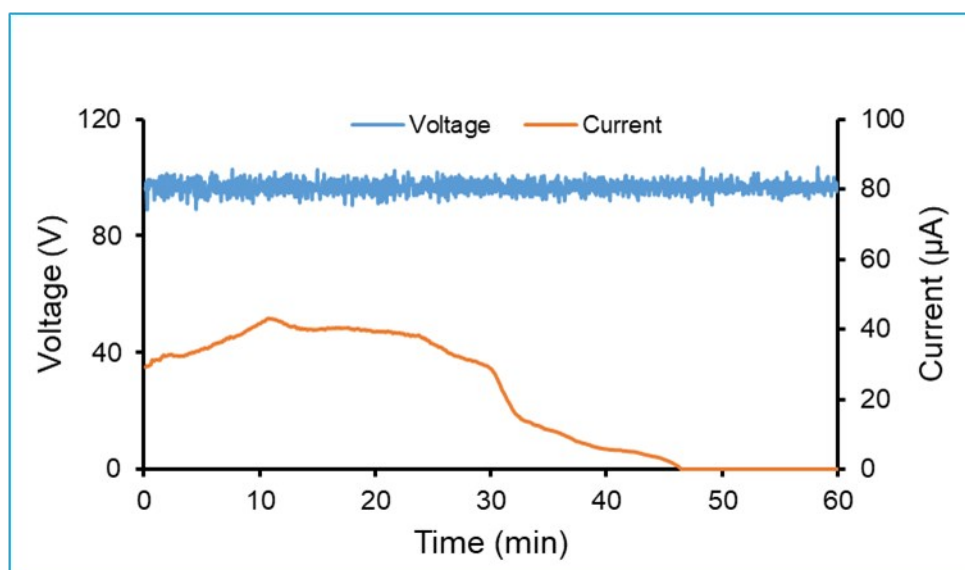

**Fig. S3.** Voltage and current changes versus the TB-IEF analysis time. The voltage was kept constant at 100 V.

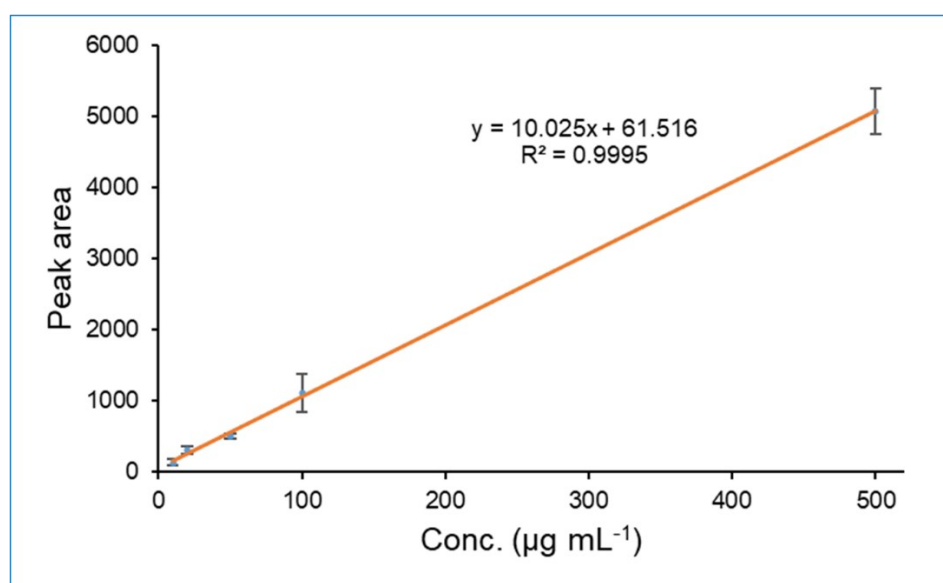

**Fig. S4.** The calibration curve of insulin upon the nylon thread after the TB-IEF process.

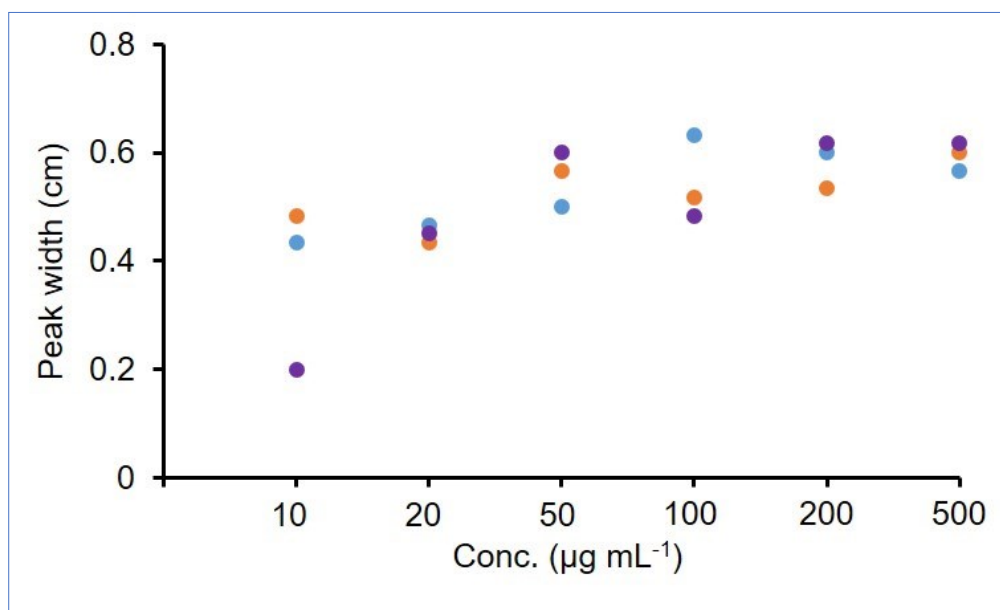

**Fig S5.** Peak width of insulin upon the thread versus concentration. The peak widths were obtained by the DESI-MS scanning along the thread after the TB-IEF process.

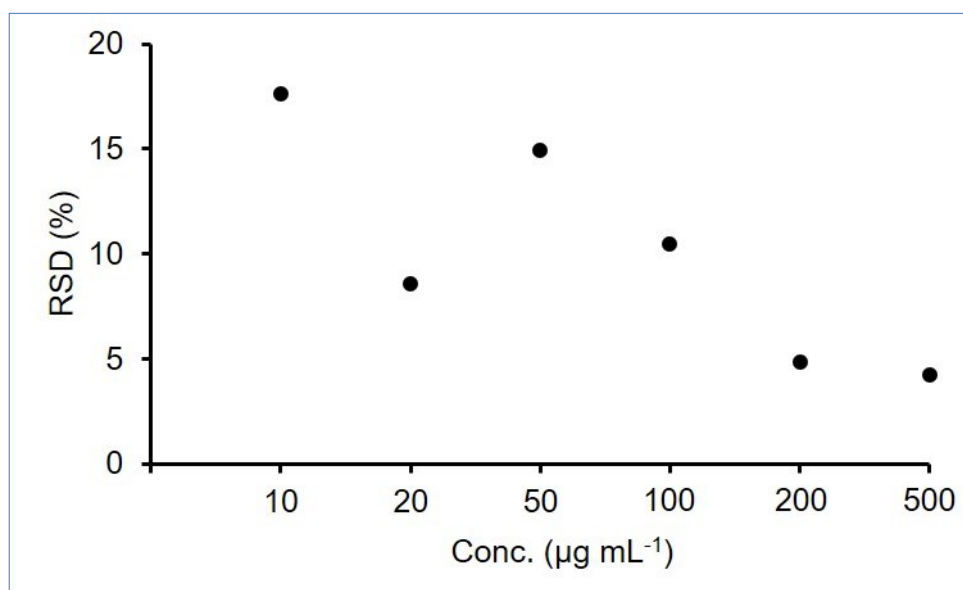

**Fig S6.** RSDs of the focused insulin samples upon the nylon thread using the TB-IEF method. The data were calculated based on the results presented in Fig. S3.
